# Supplementary material
Source: PubMed Central journal article supplement (PMC7591712)
Supplement: jmedgenet-2019-106519supp001.pdf [file jmedgenet-2019-106519supp001.pdf]

**Supplementary Table S1:** Individual clinical and tumor characteristics of patients in "PPGL" cohort. M: male, F: female, HN: head and neck PPGL, TAP: thoracic, abdominal or pelvic PPGL, PCC: pheochromocytoma, NA: not available.

| Number | Age at diagnostic | Sex | Single or multiple PPGL | Malignant PPGL | Localization of PPGL | Family history of PPGL |
|--------|-------------------|-----|-------------------------|----------------|----------------------|------------------------|
| PPGL1  | 54                | NA  | Single                  |                | HN                   |                        |
| PPGL2  | NA                | NA  | Multiple                |                | PCC                  |                        |
| PPGL3  | 16                | NA  | Single                  |                | TAP                  |                        |
| PPGL4  | 76                | NA  | Single                  |                | PCC                  |                        |
| PPGL5  | 44                | NA  | Single                  |                | PCC                  |                        |
| PPGL6  | 47                | NA  | Single                  |                | PCC                  |                        |
| PPGL7  | 47                | NA  | Single                  |                | PCC                  |                        |
| PPGL8  | 38                | NA  | Single                  |                | HN                   |                        |
| PPGL9  | 59                | NA  | Single                  |                | PCC                  |                        |
| PPGL10 | 74                | NA  | Single                  |                | HN                   |                        |
| PPGL11 | 42                | NA  | Single                  |                | PCC                  |                        |
| PPGL12 | 52                | NA  | Single                  |                | PCC                  |                        |
| PPGL13 | 13                | NA  | Multiple                |                | TAP                  |                        |
| PPGL14 | 8                 | NA  | Single                  |                | PCC                  |                        |
| PPGL15 | 45                | NA  | Single                  |                | PCC                  |                        |
| PPGL16 | 47                | NA  | Single                  |                | PCC                  |                        |
| PPGL17 | 26                | NA  | Single                  |                | PCC                  |                        |
| PPGL18 | 45                | NA  | Single                  |                | PCC                  |                        |
| PPGL19 | 44                | NA  | Single                  |                | PCC                  |                        |
| PPGL20 | 35                | NA  | Single                  | Yes            | HN                   |                        |
| PPGL21 | 44                | NA  | Single                  |                | PCC                  |                        |
| PPGL22 | 33                | NA  | Single                  |                | PCC                  |                        |
| PPGL23 | 60                | NA  | Single                  |                | TAP                  |                        |
| PPGL24 | 48                | NA  | Single                  |                | TAP                  |                        |
| PPGL25 | 59                | NA  | Single                  |                | PCC                  |                        |
| PPGL26 | 47                | NA  | Single                  |                | PCC                  |                        |
| PPGL27 | 22                | NA  | Single                  |                | PCC                  |                        |
| PPGL28 | 54                | NA  | Single                  |                | PCC                  |                        |
| PPGL29 | 66                | NA  | Single                  |                | PCC                  |                        |
| PPGL30 | 24                | NA  | Multiple                |                | TAP                  |                        |
| PPGL31 | 42                | NA  | Single                  | Yes            | TAP                  |                        |
| PPGL32 | 59                | NA  | Single                  |                | TAP                  |                        |
| PPGL33 | 59                | NA  | Single                  |                | TAP                  |                        |
| PPGL34 | 70                | NA  | Single                  |                | HN                   |                        |
| PPGL35 | 38                | NA  | Single                  |                | TAP                  |                        |
| PPGL36 | 80                | NA  | Single                  |                | PCC                  |                        |
| PPGL37 | 57                | NA  | Single                  |                | PCC                  |                        |
| PPGL38 | 60                | NA  | Single                  |                | PCC                  |                        |
| PPGL39 | 32                | NA  | Single                  |                | PCC                  |                        |
| PPGL40 | 75                | NA  | Single                  |                | HN                   |                        |
| PPGL41 | 64                | NA  | Single                  |                | TAP                  |                        |
| PPGL42 | 35                | NA  | Single                  |                | PCC                  |                        |
| PPGL43 | 35                | NA  | Single                  | Yes            | TAP                  |                        |
| PPGL44 | 47                | NA  | Single                  |                | PCC                  |                        |
| PPGL45 | 59                | NA  | Single                  |                | PCC                  |                        |
| PPGL46 | 51                | NA  | Single                  |                | HN                   |                        |
| PPGL47 | 30                | NA  | Single                  |                | TAP                  |                        |
| PPGL48 | 36                | NA  | Single                  |                | PCC                  |                        |
| PPGL49 | 75                | NA  | Single                  |                | HN                   |                        |
| PPGL50 | 67                | NA  | Single                  |                | TAP                  |                        |
| PPGL51 | 62                | NA  | Single                  |                | PCC                  |                        |
| PPGL52 | 66                | NA  | Single                  |                | PCC                  |                        |
| PPGL53 | 35                | NA  | Single                  |                | TAP                  |                        |
| PPGL54 | 69                | NA  | Single                  |                | PCC                  |                        |
| PPGL55 | 32                | NA  | Single                  |                | PCC                  |                        |
| PPGL56 | 64                | NA  | Single                  |                | PCC                  |                        |
| PPGL57 | 38                | NA  | Single                  |                | HN                   |                        |
| PPGL58 | 67                | NA  | Single                  |                | PCC                  |                        |
| PPGL59 | 55                | NA  | Single                  |                | PCC                  |                        |
| PPGL60 | 18                | NA  | Single                  |                | TAP                  |                        |
| PPGL61 | 36                | NA  | Single                  |                | PCC                  |                        |
| PPGL62 | 47                | NA  | Single                  |                | HN                   |                        |
| PPGL63 | 80                | NA  | Single                  |                | HN                   |                        |
| PPGL64 | 43                | NA  | Single                  |                | HN                   |                        |
| PPGL65 | 67                | NA  | Single                  |                | PCC                  |                        |
| PPGL66 | 78                | NA  | Single                  |                | HN                   |                        |
| PPGL67 | 66                | NA  | Single                  |                | TAP                  |                        |
| PPGL68 | 78                | NA  | Single                  |                | PCC                  |                        |
| PPGL69 | 47                | NA  | Single                  |                | PCC                  |                        |
| PPGL70 | 35                | NA  | Single                  |                | PCC                  |                        |
| PPGL71 | 64                | NA  | Single                  |                | TAP                  |                        |
| PPGL72 | NA                | NA  | Single                  |                | PCC                  |                        |
| PPGL73 | 44                | NA  | Single                  |                | PCC                  |                        |
| PPGL74 | 43                | NA  | Single                  |                | PCC                  |                        |
| PPGL75 | 58                | NA  | Single                  |                | PCC                  |                        |
| PPGL76 | 75                | NA  | Single                  |                | HN                   |                        |
| PPGL77 | 51                | NA  | Single                  |                | PCC                  |                        |
| PPGL78 | 70                | NA  | Single                  |                | PCC                  |                        |
| PPGL79 | 70                | NA  | Single                  |                | PCC                  |                        |
| PPGL80 | 46                | NA  | Single                  |                | HN                   |                        |
| PPGL81 | 36                | NA  | Single                  |                | PCC                  |                        |
| PPGL82 | 68                | NA  | Single                  |                | HN                   |                        |
| PPGL83 | 52                | NA  | Single                  |                | PCC                  |                        |
| PPGL84 | 45                | NA  | Single                  |                | TAP                  |                        |
| PPGL85 | 47                | NA  | Single                  |                | PCC                  |                        |
| PPGL86 | 28                | NA  | Single                  |                | HN                   |                        |
| PPGL87 | 41                | NA  | Single                  |                | PCC                  |                        |
| PPGL88 | 42                | NA  | Single                  |                | TAP                  |                        |
| PPGL89 | 52                | NA  | Single                  |                | PCC                  | Yes                    |

|         |    |    |          |     |         |
|---------|----|----|----------|-----|---------|
| PPGL90  | 55 | NA | Single   |     | PCC     |
| PPGL91  | 47 | NA | Single   |     | PCC     |
| PPGL92  | 64 | NA | Single   |     | TAP     |
| PPGL93  | 62 | NA | Single   |     | TAP     |
| PPGL94  | 57 | NA | Single   | Yes | PCC     |
| PPGL95  | 19 | NA | Single   |     | PCC     |
| PPGL96  | 68 | F  | Single   |     | HN      |
| PPGL97  | 43 | M  | Single   |     | PCC     |
| PPGL98  | 76 | F  | Single   |     | NA      |
| PPGL99  | 63 | F  | Single   |     | HN      |
| PPGL100 | 65 | M  | Single   |     | PCC     |
| PPGL101 | 65 | M  | Single   |     | PCC     |
| PPGL102 | 46 | F  | Single   | Yes | NA      |
| PPGL103 | 54 | F  | Single   |     | PCC     |
| PPGL104 | 66 | M  | Single   |     | PCC     |
| PPGL105 | 36 | F  | Multiple |     | HN      |
| PPGL106 | 65 | M  | Single   |     | PCC     |
| PPGL107 | 21 | M  | Single   |     | HN      |
| PPGL108 | 47 | F  | Single   |     | NA      |
| PPGL109 | 45 | M  | Single   |     | PCC     |
| PPGL110 | 64 | F  | Single   |     | PCC     |
| PPGL111 | 94 | F  | Single   |     | PCC     |
| PPGL112 | 70 | F  | Single   |     | HN      |
| PPGL113 | 37 | F  | Single   |     | PCC     |
| PPGL114 | 64 | F  | Multiple |     | TAP/PCC |
| PPGL115 | 54 | M  | Single   |     | PCC     |
| PPGL116 | 49 | M  | Single   |     | PCC     |
| PPGL117 | 71 | F  | Single   |     | HN      |
| PPGL118 | 49 | F  | Single   |     | PCC     |
| PPGL119 | 47 | F  | Single   |     | PCC     |
| PPGL120 | 52 | F  | Single   |     | HN      |
| PPGL121 | 73 | F  | Single   |     | PCC     |
| PPGL122 | 61 | F  | Single   |     | PCC     |
| PPGL123 | 48 | M  | Single   |     | PCC     |
| PPGL124 | 72 | F  | Single   |     | NA      |
| PPGL125 | 58 | M  | Single   |     | HN      |
| PPGL126 | 51 | M  | Single   | Yes | PCC     |
| PPGL127 | 50 | M  | Single   |     | NA      |
| PPGL128 | 78 | F  | Single   |     | PCC     |
| PPGL129 | 83 | F  | Single   |     | NA      |
| PPGL130 | 65 | F  | Single   |     | PCC     |
| PPGL131 | 78 | F  | Single   |     | HN      |
| PPGL132 | 61 | M  | Multiple |     | NA      |
| PPGL133 | 55 | F  | Single   |     | PCC     |
| PPGL134 | 57 | M  | Single   |     | PCC     |
| PPGL135 | 40 | M  | Single   |     | PCC     |
| PPGL136 | 60 | M  | Single   |     | PCC     |
| PPGL137 | 57 | M  | Single   |     | PCC     |
| PPGL138 | 58 | F  | Single   |     | TAP     |
| PPGL139 | 58 | F  | Single   |     | PCC     |
| PPGL140 | 60 | F  | Single   |     | PCC     |
| PPGL141 | 47 | F  | Single   |     | PCC     |
| PPGL142 | 48 | M  | Single   |     | TAP     |
| PPGL143 | 52 | F  | Single   |     | PCC     |
| PPGL144 | 56 | M  | Single   |     | PCC     |
| PPGL145 | 38 | F  | Single   |     | TAP     |
| PPGL146 | 42 | M  | Single   |     | PCC     |
| PPGL147 | 69 | M  | Single   |     | HN      |
| PPGL148 | 52 | M  | Single   |     | NA      |
| PPGL149 | 61 | F  | Single   |     | PCC     |
| PPGL150 | 42 | M  | Single   |     | HN      |
| PPGL151 | 49 | F  | Single   |     | PCC     |
| PPGL152 | 50 | M  | Single   |     | PCC     |
| PPGL153 | 66 | F  | Single   |     | NA      |
| PPGL154 | 19 | M  | Single   |     | PCC     |
| PPGL155 | 71 | F  | Single   |     | HN      |
| PPGL156 | 61 | F  | Single   |     | PCC     |
| PPGL157 | 58 | F  | Single   |     | TAP     |
| PPGL158 | 56 | M  | Single   |     | PCC     |
| PPGL159 | 69 | F  | Single   |     | PCC     |
| PPGL160 | 32 | M  | Multiple |     | NA      |
| PPGL161 | 82 | F  | Single   |     | HN      |
| PPGL162 | 68 | F  | Single   |     | PCC     |
| PPGL163 | 40 | F  | Single   |     | HN      |
| PPGL164 | 56 | M  | Single   |     | PCC     |
| PPGL165 | 52 | F  | Multiple |     | HN      |
| PPGL166 | 58 | F  | Single   |     | PCC     |
| PPGL167 | 68 | M  | Single   |     | PCC     |
| PPGL168 | 68 | M  | Single   |     | HN      |
| PPGL169 | 73 | F  | Single   |     | HN      |
| PPGL170 | 76 | M  | Single   |     | PCC     |
| PPGL171 | 38 | M  | Single   |     | PCC     |
| PPGL172 | 49 | F  | Single   |     | HN      |
| PPGL173 | 66 | F  | Single   |     | NA      |
| PPGL174 | 63 | M  | Single   |     | PCC     |
| PPGL175 | 84 | M  | Single   |     | NA      |

|         |    |   |          |     |         |     |
|---------|----|---|----------|-----|---------|-----|
| PPGL176 | NA | M | Single   |     | PCC     |     |
| PPGL177 | 64 | M | Single   |     | PCC     |     |
| PPGL178 | NA | M | Single   | Yes | NA      |     |
| PPGL179 | 57 | M | Single   |     | PCC     |     |
| PPGL180 | 67 | F | Single   |     | HN      |     |
| PPGL181 | 74 | F | Single   |     | HN      |     |
| PPGL182 | 62 | M | Single   |     | PCC     |     |
| PPGL183 | 41 | F | Single   |     | NA      |     |
| PPGL184 | 70 | F | Single   |     | PCC     |     |
| PPGL185 | 41 | F | Single   |     | PCC     |     |
| PPGL186 | 21 | M | Single   |     | HN      |     |
| PPGL187 | 56 | M | Single   |     | TAP     |     |
| PPGL188 | 48 | F | Single   |     | PCC     |     |
| PPGL189 | 69 | M | Single   |     | HN      |     |
| PPGL190 | 63 | F | Single   |     | PCC     |     |
| PPGL191 | 36 | M | Single   |     | NA      |     |
| PPGL192 | 77 | F | Single   |     | PCC     |     |
| PPGL193 | 50 | F | Single   |     | PCC     |     |
| PPGL194 | 67 | M | Single   |     | PCC     |     |
| PPGL195 | 55 | F | Single   |     | TAP     |     |
| PPGL196 | 71 | F | Single   |     | PCC     |     |
| PPGL197 | 62 | M | Single   |     | PCC     |     |
| PPGL198 | 70 | F | Single   |     | HN      | Yes |
| PPGL199 | 31 | F | Single   |     | PCC     | Yes |
| PPGL200 | 45 | F | Single   |     | HN      |     |
| PPGL201 | 23 | M | Multiple |     | HN      | Yes |
| PPGL202 | 22 | M | Single   |     | PCC     |     |
| PPGL203 | NA | F | Multiple |     | HN      | Yes |
| PPGL204 | 14 | M | Single   |     | TAP     |     |
| PPGL205 | 32 | M | Multiple |     | HN/TAP  |     |
| PPGL206 | 69 | F | Multiple |     | HN      |     |
| PPGL207 | 33 | F | Single   |     | TAP     |     |
| PPGL208 | 49 | M | Multiple |     | HN      |     |
| PPGL209 | 53 | F | Multiple |     | TAP     |     |
| PPGL210 | 44 | M | Multiple |     | TAP     |     |
| PPGL211 | 35 | M | Single   | Yes | TAP     |     |
| PPGL212 | 27 | F | Single   | Yes | TAP     |     |
| PPGL213 | 29 | F | Single   |     | HN      |     |
| PPGL214 | 17 | M | Single   |     | TAP     |     |
| PPGL215 | 54 | F | Multiple |     | HN      |     |
| PPGL216 | 47 | F | Single   |     | HN      |     |
| PPGL217 | 28 | F | Single   |     | HN      |     |
| PPGL218 | 46 | M | Multiple |     | HN      |     |
| PPGL219 | 29 | M | Single   |     | HN      |     |
| PPGL220 | 32 | F | Single   | Yes | TAP     |     |
| PPGL221 | 32 | F | Single   |     | HN      |     |
| PPGL222 | 24 | F | Single   |     | HN      |     |
| PPGL223 | 17 | F | Single   |     | HN      |     |
| PPGL224 | 30 | M | Single   |     | TAP     |     |
| PPGL225 | 50 | F | Multiple |     | HN      |     |
| PPGL226 | 20 | F | Single   |     | TAP     |     |
| PPGL227 | 19 | M | Single   |     | TAP     |     |
| PPGL228 | 27 | F | Single   |     | TAP     |     |
| PPGL229 | 34 | M | Single   |     | HN      |     |
| PPGL230 | 26 | F | Single   | Yes | HN      |     |
| PPGL231 | 66 | M | Multiple |     | TAP     |     |
| PPGL232 | 31 | F | Single   |     | HN      |     |
| PPGL233 | 25 | M | Single   |     | HN      |     |
| PPGL234 | 30 | F | Single   | Yes | HN      |     |
| PPGL235 | 19 | F | Multiple |     | HN      |     |
| PPGL236 | 71 | M | Multiple |     | TAP/PCC |     |
| PPGL237 | NA | F | Single   |     | NA      |     |
| PPGL238 | 60 | F | Multiple |     | HN      |     |
| PPGL239 | 39 | M | Multiple |     | HN      |     |
| PPGL240 | 62 | F | Single   |     | TAP     |     |
| PPGL241 | 21 | M | Multiple |     | TAP/PCC |     |
| PPGL242 | 11 | M | Single   |     | TAP     |     |
| PPGL243 | 27 | F | Multiple |     | TAP     |     |
| PPGL244 | 43 | M | Single   |     | TAP     |     |
| PPGL245 | 28 | F | Single   |     | HN      |     |
| PPGL246 | 20 | F | Single   |     | TAP     |     |
| PPGL247 | 25 | F | Single   |     | HN      |     |
| PPGL248 | 16 | F | Single   |     | TAP     |     |
| PPGL249 | 64 | F | Multiple |     | HN      |     |
| PPGL250 | 33 | M | Single   |     | HN      |     |
| PPGL251 | 32 | F | Single   |     | TAP     |     |
| PPGL252 | 33 | M | Single   |     | HN      |     |
| PPGL253 | 17 | F | Single   |     | TAP     |     |
| PPGL254 | 32 | M | Single   |     | HN      |     |
| PPGL255 | 34 | M | Single   |     | HN      |     |
| PPGL256 | 33 | F | Single   | Yes | HN      |     |
| PPGL257 | 46 | M | Multiple |     | HN      |     |
| PPGL258 | 74 | F | Multiple |     | HN      |     |
| PPGL259 | 53 | F | Single   |     | HN      |     |
| PPGL260 | 33 | F | Single   |     | HN      |     |
| PPGL261 | 32 | F | Single   |     | TAP     |     |
| PPGL262 | 25 | F | Single   |     | HN      |     |
| PPGL263 | 30 | F | Single   |     | PCC     |     |
| PPGL264 | 33 | M | Single   |     | TAP     |     |
| PPGL265 | 32 | M | Single   | Yes | TAP     |     |

|         |    |   |          |     |         |     |
|---------|----|---|----------|-----|---------|-----|
| PPGL266 | 68 | F | Multiple |     | HN      |     |
| PPGL267 | 19 | M | Single   |     | HN      |     |
| PPGL268 | 35 | M | Single   |     | HN      |     |
| PPGL269 | 80 | M | Multiple |     | TAP/PCC |     |
| PPGL270 | NA | M | Single   |     | TAP     |     |
| PPGL271 | NA | F | Single   |     | TAP     |     |
| PPGL272 | 9  | F | Single   |     | HN      |     |
| PPGL273 | 35 | F | Single   |     | HN      |     |
| PPGL274 | 34 | F | Multiple | Yes | TAP/PCC |     |
| PPGL275 | 29 | F | Multiple |     | TAP     |     |
| PPGL276 | 29 | F | Single   |     | TAP     |     |
| PPGL277 | 55 | F | Multiple |     | HN/TAP  |     |
| PPGL278 | 14 | M | Single   |     | HN      |     |
| PPGL279 | 8  | M | Single   |     | TAP     |     |
| PPGL280 | 33 | M | Single   |     | HN      |     |
| PPGL281 | 15 | F | Single   |     | TAP     |     |
| PPGL282 | 22 | F | Single   | Yes | HN      |     |
| PPGL283 | 32 | M | Single   |     | HN      | Yes |
| PPGL284 | 43 | M | Multiple |     | HN      |     |
| PPGL285 | 33 | F | Single   |     | HN      |     |
| PPGL286 | 34 | F | Single   |     | HN      |     |
| PPGL287 | 31 | M | Single   | Yes | HN      | Yes |
| PPGL288 | 33 | M | Single   |     | NA      |     |
| PPGL289 | 16 | M | Single   |     | TAP     |     |
| PPGL290 | 35 | F | Single   |     | HN      |     |
| PPGL291 | 35 | M | Single   |     | TAP     | Yes |
| PPGL292 | 29 | M | Single   | Yes | TAP     |     |
| PPGL293 | 45 | F | Multiple |     | HN      | Yes |
| PPGL294 | 17 | M | Multiple | Yes | HN      |     |
| PPGL295 | 22 | F | Multiple |     | HN      |     |
| PPGL296 | 49 | F | Multiple |     | HN      |     |
| PPGL297 | 34 | F | Single   |     | HN      |     |
| PPGL298 | 22 | M | Single   |     | TAP     |     |
| PPGL299 | 17 | F | Single   |     | HN      |     |
| PPGL300 | 31 | F | Multiple |     | HN/TAP  |     |
| PPGL301 | 35 | F | Single   |     | HN      |     |
| PPGL302 | 50 | F | Multiple |     | TAP/PCC |     |
| PPGL303 | 73 | F | Multiple |     | HN      |     |
| PPGL304 | 35 | F | Single   |     | HN      |     |
| PPGL305 | 15 | F | Multiple |     | TAP/PCC |     |
| PPGL306 | 74 | F | Multiple |     | TAP/PCC |     |
| PPGL307 | 32 | F | Multiple |     | TAP     |     |
| PPGL308 | 32 | F | Single   |     | HN      |     |
| PPGL309 | 22 | F | Single   | Yes | HN      |     |
| PPGL310 | 34 | M | Single   |     | HN      |     |
| PPGL311 | 23 | F | Single   |     | HN      |     |
| PPGL312 | 35 | M | Single   |     | HN      |     |
| PPGL313 | 34 | M | Single   |     | HN      |     |
| PPGL314 | 74 | M | Multiple |     | HN/TAP  |     |
| PPGL315 | 22 | F | Single   |     | HN      |     |
| PPGL316 | 47 | F | Multiple |     | HN/TAP  |     |
| PPGL317 | 34 | F | Multiple |     | TAP     |     |
| PPGL318 | 22 | M | Single   |     | HN      |     |
| PPGL319 | 35 | M | Single   |     | HN      |     |
| PPGL320 | 30 | F | Single   |     | HN      |     |
| PPGL321 | 30 | F | Single   |     | HN      |     |
| PPGL322 | 22 | F | Single   |     | HN      |     |
| PPGL323 | 25 | F | Single   |     | HN      |     |
| PPGL324 | 27 | M | Single   |     | HN      |     |
| PPGL325 | 33 | M | Single   |     | HN      |     |
| PPGL326 | 17 | F | Single   |     | HN      |     |
| PPGL327 | 54 | F | Multiple |     | TAP     |     |
| PPGL328 | 28 | F | Single   |     | HN      |     |
| PPGL329 | 25 | M | Single   |     | HN      |     |
| PPGL330 | 27 | F | Multiple |     | HN/TAP  |     |
| PPGL331 | 32 | M | Single   |     | HN      |     |
| PPGL332 | 30 | F | Single   |     | TAP     |     |
| PPGL333 | 12 | F | Multiple |     | HN      |     |
| PPGL334 | 26 | F | Single   |     | HN      |     |
| PPGL335 | 30 | F | Single   |     | HN      |     |
| PPGL336 | 34 | F | Single   |     | HN      |     |
| PPGL337 | 35 | M | Single   |     | HN      |     |
| PPGL338 | 28 | F | Single   |     | HN      |     |
| PPGL339 | 35 | M | Single   |     | HN      |     |
| PPGL340 | 30 | M | Single   |     | HN      |     |
| PPGL341 | 33 | F | Single   | Yes | TAP     |     |
| PPGL342 | 20 | M | Single   |     | HN      |     |
| PPGL343 | 28 | F | Single   |     | PCC     |     |
| PPGL344 | 34 | M | Single   | Yes | PCC     |     |
| PPGL345 | 31 | F | Single   |     | PCC     |     |
| PPGL346 | 35 | F | Single   |     | PCC     |     |
| PPGL347 | 19 | F | Single   |     | PCC     |     |
| PPGL348 | 27 | M | Single   |     | HN      |     |
| PPGL349 | 30 | F | Single   | Yes | PCC     |     |
| PPGL350 | 26 | M | Single   |     | PCC     |     |
| PPGL351 | 26 | F | Single   |     | PCC     |     |
| PPGL352 | 30 | F | Single   |     | PCC     |     |
| PPGL353 | 14 | F | Single   |     | PCC     |     |
| PPGL354 | 14 | M | Single   |     | PCC     |     |
| PPGL355 | 31 | M | Single   |     | PCC     |     |
| PPGL356 | 35 | M | Single   |     | PCC     |     |
| PPGL357 | 8  | M | Single   |     | PCC     |     |

|         |    |   |          |     |         |
|---------|----|---|----------|-----|---------|
| PPGL358 | 33 | M | Multiple |     | TAP/PCC |
| PPGL359 | 24 | M | Single   | Yes | TAP     |
| PPGL360 | 21 | M | Single   |     | PCC     |
| PPGL361 | 16 | M | Single   |     | PCC     |
| PPGL362 | 11 | M | Single   |     | PCC     |
| PPGL363 | 33 | F | Single   |     | PCC     |
| PPGL364 | 28 | F | Single   |     | PCC     |
| PPGL365 | 25 | F | Multiple |     | PCC     |
| PPGL366 | 32 | M | Single   |     | PCC     |
| PPGL367 | 11 | M | Single   |     | PCC     |
| PPGL368 | 29 | M | Single   |     | PCC     |
| PPGL369 | 22 | F | Single   |     | PCC     |
| PPGL370 | 29 | F | Single   |     | PCC     |
| PPGL371 | 35 | M | Single   |     | PCC     |
| PPGL372 | 29 | F | Single   |     | TAP     |
| PPGL373 | 35 | F | Single   |     | PCC     |
| PPGL374 | 18 | F | Single   |     | PCC     |
| PPGL375 | 35 | F | Single   |     | PCC     |
| PPGL376 | 30 | M | Single   |     | PCC     |
| PPGL377 | 27 | F | Single   |     | PCC     |
| PPGL378 | 14 | F | Single   |     | TAP     |
| PPGL379 | 27 | M | Single   |     | PCC     |
| PPGL380 | 33 | F | Single   |     | TAP     |
| PPGL381 | 27 | M | Single   |     | PCC     |
| PPGL382 | 33 | M | Single   |     | PCC     |
| PPGL383 | 35 | F | Single   |     | PCC     |
| PPGL384 | 47 | M | Multiple |     | HN      |
| PPGL385 | 11 | M | Multiple | Yes | PCC     |
| PPGL386 | 32 | M | Single   |     | PCC     |
| PPGL387 | 64 | F | Single   |     | PCC     |
| PPGL388 | 21 | M | Single   |     | PCC     |
| PPGL389 | 26 | M | Single   |     | PCC     |
| PPGL390 | 31 | F | Single   |     | PCC     |
| PPGL391 | 21 | M | Single   |     | PCC     |
| PPGL392 | 35 | M | Single   |     | PCC     |
| PPGL393 | 20 | M | Single   |     | PCC     |
| PPGL394 | 27 | F | Single   |     | PCC     |
| PPGL395 | 32 | F | Single   |     | PCC     |
| PPGL396 | 31 | M | Single   |     | PCC     |
| PPGL397 | 21 | F | Multiple |     | PCC     |
| PPGL398 | 33 | M | Single   |     | PCC     |
| PPGL399 | 38 | M | Single   |     | PCC     |
| PPGL400 | 34 | M | Single   |     | PCC     |
| PPGL401 | 25 | M | Single   |     | PCC     |
| PPGL402 | 29 | M | Single   |     | PCC     |
| PPGL403 | 44 | F | Multiple |     | PCC     |
| PPGL404 | 28 | M | Single   |     | PCC     |
| PPGL405 | 31 | M | Single   |     | PCC     |
| PPGL406 | 34 | M | Single   |     | PCC     |
| PPGL407 | 35 | F | Single   |     | PCC     |
| PPGL408 | 35 | M | Single   |     | PCC     |
| PPGL409 | 34 | F | Single   |     | PCC     |
| PPGL410 | 24 | F | Single   |     | PCC     |
| PPGL411 | 13 | F | Multiple |     | TAP/PCC |
| PPGL412 | 31 | F | Single   |     | PCC     |
| PPGL413 | 33 | M | Single   |     | PCC     |
| PPGL414 | 25 | M | Single   |     | PCC     |
| PPGL415 | 13 | F | Multiple |     | TAP     |
| PPGL416 | 33 | F | Single   |     | PCC     |
| PPGL417 | 30 | F | Single   |     | PCC     |
| PPGL418 | 30 | F | Single   |     | PCC     |
| PPGL419 | 59 | M | Multiple |     | PCC     |
| PPGL420 | 30 | M | Single   |     | PCC     |
| PPGL421 | 39 | F | Multiple |     | TAP/PCC |
| PPGL422 | 64 | F | Multiple |     | PCC     |
| PPGL423 | 21 | F | Single   |     | PCC     |
| PPGL424 | 45 | M | Single   | Yes | PCC     |
| PPGL425 | 17 | M | Single   |     | PCC     |
| PPGL426 | 34 | M | Single   | Yes | PCC     |
| PPGL427 | 54 | M | Single   | Yes | PCC     |
| PPGL428 | 39 | M | Single   | Yes | PCC     |
| PPGL429 | 13 | M | Single   |     | PCC     |
| PPGL430 | 32 | F | Single   |     | PCC     |
| PPGL431 | 21 | M | Single   |     | PCC     |
| PPGL432 | 28 | F | Single   |     | PCC     |
| PPGL433 | 13 | F | Single   |     | TAP     |
| PPGL434 | 35 | F | Single   |     | PCC     |
| PPGL435 | 62 | F | Multiple |     | TAP/PCC |
| PPGL436 | 33 | M | Single   |     | PCC     |
| PPGL437 | 50 | F | Multiple |     | NA      |
| PPGL438 | 27 | M | Single   | Yes | PCC     |
| PPGL439 | 33 | M | Single   |     | PCC     |
| PPGL440 | 33 | M | Single   | Yes | PCC     |
| PPGL441 | 26 | M | Single   |     | PCC     |
| PPGL442 | 35 | F | Single   |     | PCC     |
| PPGL443 | 56 | F | Single   |     | PCC     |
| PPGL444 | 35 | F | Single   |     | PCC     |
| PPGL445 | 10 | F | Single   |     | TAP     |
| PPGL446 | 34 | F | Single   |     | PCC     |
| PPGL447 | 28 | F | Single   |     | PCC     |
| PPGL448 | 40 | M | Multiple |     | TAP/PCC |
| PPGL449 | 35 | M | Single   | Yes | PCC     |

|         |    |   |          |     |         |     |
|---------|----|---|----------|-----|---------|-----|
| PPGL450 | 21 | F | Single   |     | PCC     |     |
| PPGL451 | 33 | M | Single   | Yes | PCC     |     |
| PPGL452 | 18 | F | Single   | Yes | PCC     |     |
| PPGL453 | 15 | F | Single   | Yes | PCC     |     |
| PPGL454 | 22 | F | Single   |     | PCC     |     |
| PPGL455 | 26 | M | Single   |     | PCC     |     |
| PPGL456 | 52 | F | Single   |     | PCC     |     |
| PPGL457 | 57 | M | Single   |     | NA      | Yes |
| PPGL458 | 18 | M | Single   |     | PCC     |     |
| PPGL459 | 28 | M | Single   |     | PCC     |     |
| PPGL460 | 55 | F | Multiple |     | PCC     |     |
| PPGL461 | 19 | M | Single   |     | TAP     |     |
| PPGL462 | 26 | M | Single   | Yes | TAP     |     |
| PPGL463 | 26 | F | Single   |     | PCC     |     |
| PPGL464 | 31 | M | Single   |     | PCC     |     |
| PPGL465 | 13 | M | Multiple |     | PCC     |     |
| PPGL466 | 28 | F | Multiple |     | TAP/PCC |     |
| PPGL467 | 23 | F | Single   |     | TAP     |     |
| PPGL468 | 23 | M | Single   |     | PCC     |     |
| PPGL469 | 34 | M | Single   |     | PCC     |     |
| PPGL470 | 16 | F | Single   |     | TAP     |     |
| PPGL471 | 32 | M | Single   |     | PCC     |     |
| PPGL472 | 60 | F | Single   |     | PCC     |     |
| PPGL473 | 12 | F | Single   |     | PCC     |     |
| PPGL474 | 31 | F | Single   | Yes | TAP     |     |
| PPGL475 | 46 | F | Single   |     | PCC     | Yes |
| PPGL476 | 54 | F | Multiple |     | TAP/PCC |     |
| PPGL477 | 36 | F | Single   | Yes | PCC     | Yes |
| PPGL478 | 22 | F | Single   | Yes | PCC     |     |
| PPGL479 | 12 | M | Single   |     | PCC     |     |
| PPGL480 | 8  | M | Single   |     | PCC     |     |
| PPGL481 | 13 | M | Single   |     | PCC     |     |
| PPGL482 | 32 | F | Single   |     | PCC     |     |
| PPGL483 | 21 | M | Single   |     | PCC     |     |
| PPGL484 | 35 | F | Single   |     | PCC     |     |
| PPGL485 | 26 | F | Single   |     | PCC     |     |
| PPGL486 | 30 | M | Single   |     | PCC     |     |
| PPGL487 | 30 | F | Single   |     | PCC     |     |
| PPGL488 | 25 | F | Single   |     | TAP     | Yes |
| PPGL489 | 18 | M | Single   |     | PCC     |     |
| PPGL490 | 15 | F | Single   |     | PCC     |     |
| PPGL491 | 28 | M | Single   |     | PCC     |     |
| PPGL492 | 34 | F | Multiple | Yes | PCC     |     |
| PPGL493 | 30 | M | Single   |     | PCC     |     |
| PPGL494 | 18 | M | Single   |     | PCC     |     |
| PPGL495 | 34 | M | Single   |     | PCC     |     |
| PPGL496 | 12 | M | Multiple |     | TAP/PCC |     |
| PPGL497 | 14 | F | Single   |     | PCC     |     |
| PPGL498 | 25 | F | Single   |     | PCC     |     |
| PPGL499 | 30 | F | Single   |     | PCC     |     |
| PPGL500 | 18 | M | Single   |     | PCC     |     |
| PPGL501 | 33 | F | Single   |     | PCC     |     |
| PPGL502 | 48 | M | Multiple |     | TAP     |     |
| PPGL503 | 24 | M | Single   |     | PCC     |     |
| PPGL504 | NA | M | Single   |     | NA      |     |
| PPGL505 | 53 | F | Single   |     | PCC     |     |
| PPGL506 | 24 | M | Single   |     | PCC     |     |
| PPGL507 | 25 | F | Single   |     | PCC     |     |
| PPGL508 | 34 | F | Single   |     | PCC     |     |
| PPGL509 | 31 | M | Single   |     | PCC     |     |
| PPGL510 | 31 | M | Single   |     | PCC     |     |
| PPGL511 | 29 | M | Single   |     | PCC     |     |
| PPGL512 | 19 | M | Single   |     | PCC     |     |
| PPGL513 | 35 | F | Single   |     | PCC     |     |
| PPGL514 | 28 | M | Single   |     | PCC     |     |
| PPGL515 | 35 | F | Single   |     | PCC     |     |
| PPGL516 | 25 | F | Multiple |     | PCC     |     |
| PPGL517 | 32 | F | Single   |     | PCC     |     |
| PPGL518 | 33 | F | Single   |     | TAP     |     |
| PPGL519 | 35 | F | Single   |     | PCC     |     |
| PPGL520 | 40 | M | Multiple |     | TAP/PCC |     |
| PPGL521 | 32 | F | Single   |     | PCC     |     |
| PPGL522 | 31 | F | Single   |     | PCC     |     |
| PPGL523 | 35 | F | Single   |     | PCC     |     |
| PPGL524 | 30 | F | Single   |     | PCC     |     |
| PPGL525 | 44 | F | Multiple | Yes | TAP/PCC | Yes |
| PPGL526 | 27 | F | Single   |     | PCC     |     |
| PPGL527 | 27 | M | Single   |     | PCC     |     |
| PPGL528 | 26 | M | Single   |     | PCC     |     |
| PPGL529 | 30 | M | Single   | Yes | PCC     |     |
| PPGL530 | 14 | M | Single   |     | PCC     |     |
| PPGL531 | 33 | M | Single   |     | PCC     |     |
| PPGL532 | 44 | F | Multiple | Yes | PCC     |     |
| PPGL533 | 30 | F | Single   |     | PCC     |     |
| PPGL534 | 49 | M | Multiple |     | PCC     |     |
| PPGL535 | 17 | F | Single   | Yes | PCC     |     |
| PPGL536 | 33 | M | Single   |     | PCC     |     |
| PPGL537 | 22 | F | Single   |     | PCC     |     |
| PPGL538 | 22 | M | Single   |     | PCC     |     |
| PPGL539 | 36 | M | Multiple |     | TAP     |     |
| PPGL540 | 23 | M | Single   |     | PCC     |     |
| PPGL541 | 25 | M | Single   |     | PCC     |     |

|         |    |    |          |     |         |     |
|---------|----|----|----------|-----|---------|-----|
| PPGL542 | 32 | M  | Single   | Yes | PCC     |     |
| PPGL543 | 24 | M  | Single   |     | PCC     |     |
| PPGL544 | 32 | F  | Single   |     | PCC     |     |
| PPGL545 | 18 | M  | Single   |     | PCC     |     |
| PPGL546 | 46 | M  | Single   |     | PCC     | Yes |
| PPGL547 | 34 | F  | Single   |     | PCC     |     |
| PPGL548 | 25 | F  | Single   |     | PCC     |     |
| PPGL549 | 27 | F  | Single   |     | PCC     |     |
| PPGL550 | 43 | M  | Multiple |     | PCC     |     |
| PPGL551 | 28 | F  | Single   |     | PCC     |     |
| PPGL552 | 19 | M  | Single   |     | PCC     |     |
| PPGL553 | 23 | M  | Single   |     | PCC     |     |
| PPGL554 | 30 | M  | Single   |     | PCC     |     |
| PPGL555 | 34 | M  | Single   |     | PCC     |     |
| PPGL556 | 35 | M  | Single   |     | PCC     |     |
| PPGL557 | 60 | M  | Multiple |     | PCC     |     |
| PPGL558 | 10 | NA | Multiple |     | TAP/PCC |     |
| PPGL559 | 37 | NA | Single   |     | PCC     |     |
| PPGL560 | 9  | NA | Single   |     | PCC     |     |
| PPGL561 | 54 | NA | Single   |     | PCC     |     |
| PPGL562 | 42 | NA | Single   | Yes | PCC     |     |
| PPGL563 | 28 | NA | Single   |     | PCC     |     |
| PPGL564 | 74 | NA | Single   |     | PCC     |     |
| PPGL565 | 14 | NA | Multiple |     | PCC/HN  |     |
| PPGL566 | 44 | NA | Single   |     | PCC     |     |
| PPGL567 | 32 | NA | Single   | Yes | PCC     |     |
| PPGL568 | 14 | NA | Multiple | Yes | TAP/PCC |     |
| PPGL569 | 56 | NA | Single   |     | PCC     |     |
| PPGL570 | 27 | NA | Single   |     | PCC     |     |
| PPGL571 | 25 | NA | Single   |     | PCC     |     |
| PPGL572 | 9  | NA | Single   |     | PCC     |     |
| PPGL573 | 32 | NA | Single   |     | PCC     |     |
| PPGL574 | 43 | NA | Single   |     | PCC     |     |
| PPGL575 | NA | NA | Single   |     | PCC     |     |
| PPGL576 | 55 | NA | Single   |     | PCC     |     |
| PPGL577 | 40 | NA | Single   |     | PCC     |     |
| PPGL578 | NA | NA | Single   |     | PCC     |     |
| PPGL579 | 71 | NA | Single   |     | PCC     |     |
| PPGL580 | 41 | NA | Single   |     | PCC     |     |
| PPGL581 | 42 | NA | Single   |     | PCC     |     |
| PPGL582 | 20 | NA | Single   |     | TAP     |     |
| PPGL583 | 60 | NA | Single   |     | PCC     |     |
| PPGL584 | 63 | NA | Single   |     | TAP     |     |
| PPGL585 | NA | NA | Single   |     | PCC     |     |
| PPGL586 | NA | NA | Single   |     | PCC     |     |
| PPGL587 | NA | NA | Single   |     | PCC     |     |
| PPGL588 | NA | NA | Single   |     | PCC     |     |
| PPGL589 | NA | NA | Single   |     | PCC     |     |
| PPGL590 | NA | NA | Single   |     | PCC     |     |
| PPGL591 | NA | NA | Single   |     | PCC     |     |
| PPGL592 | NA | NA | Single   |     | PCC     |     |
| PPGL593 | NA | NA | Single   |     | PCC     |     |
| PPGL594 | NA | NA | Single   |     | PCC     |     |
| PPGL595 | NA | NA | Single   |     | PCC     |     |
| PPGL596 | NA | NA | Single   |     | PCC     |     |
| PPGL597 | 17 | NA | Single   |     | TAP     |     |
| PPGL598 | 32 | NA | Single   |     | PCC     |     |
| PPGL599 | 30 | NA | Single   |     | PCC     |     |
| PPGL600 | 22 | NA | Single   |     | TAP     |     |
| PPGL601 | 53 | NA | Single   |     | PCC     |     |
| PPGL602 | 21 | NA | Single   |     | PCC     |     |
| PPGL603 | 14 | NA | Single   |     | PCC     |     |
| PPGL604 | 39 | NA | Single   |     | PCC     |     |
| PPGL605 | 53 | NA | Single   |     | PCC     |     |
| PPGL606 | 29 | NA | Single   | Yes | PCC     |     |
| PPGL607 | 47 | NA | Multiple |     | PCC     |     |
| PPGL608 | 50 | NA | Single   |     | PCC     |     |
| PPGL609 | 59 | NA | Single   |     | PCC     |     |
| PPGL610 | 33 | NA | Single   |     | PCC     |     |
| PPGL611 | 46 | NA | Single   |     | PCC     |     |
| PPGL612 | 48 | NA | Single   |     | PCC     |     |
| PPGL613 | 52 | NA | Single   |     | PCC     |     |
| PPGL614 | 48 | NA | Single   |     | PCC     |     |
| PPGL615 | 43 | NA | Single   |     | PCC     |     |
| PPGL616 | 13 | NA | Single   |     | PCC     |     |
| PPGL617 | 45 | NA | Single   |     | PCC     |     |
| PPGL618 | 14 | NA | Single   |     | PCC     |     |
| PPGL619 | 53 | NA | Single   |     | PCC     |     |
| PPGL620 | 8  | NA | Single   | Yes | TAP     |     |
| PPGL621 | 42 | NA | Single   |     | PCC     |     |
| PPGL622 | 51 | NA | Single   |     | PCC     |     |
| PPGL623 | 61 | NA | Single   |     | PCC     |     |
| PPGL624 | 19 | NA | Single   |     | PCC     |     |
| PPGL625 | 39 | NA | Single   |     | PCC     |     |
| PPGL626 | NA | NA | Single   | Yes | TAP     |     |
| PPGL627 | 53 | NA | Single   |     | TAP     |     |
| PPGL628 | 14 | NA | Single   | Yes | TAP     | Yes |
| PPGL629 | 16 | NA | Single   |     | TAP     |     |
| PPGL630 | 26 | NA | Single   |     | PCC     |     |
| PPGL631 | 55 | NA | Single   |     | PCC     |     |
| PPGL632 | 45 | NA | Single   |     | PCC     |     |
| PPGL633 | 8  | NA | Multiple |     | TAP     |     |

|         |    |    |          |     |         |
|---------|----|----|----------|-----|---------|
| PPGL634 | 17 | NA | Single   | Yes | PCC     |
| PPGL635 | 71 | NA | Single   |     | PCC     |
| PPGL636 | 30 | NA | Single   |     | PCC     |
| PPGL637 | 59 | NA | Single   |     | PCC     |
| PPGL638 | 43 | NA | Single   |     | PCC     |
| PPGL639 | 76 | NA | Single   | Yes | TAP     |
| PPGL640 | 28 | NA | Multiple |     | PCC     |
| PPGL641 | 47 | NA | Single   |     | HN      |
| PPGL642 | 60 | NA | Multiple |     | HN      |
| PPGL643 | 48 | NA | Single   |     | HN      |
| PPGL644 | 45 | NA | Multiple |     | PCC     |
| PPGL645 | 31 | NA | Single   |     | PCC     |
| PPGL646 | 74 | F  | Single   |     | HN      |
| PPGL647 | 56 | F  | Single   |     | HN      |
| PPGL648 | 29 | M  | Single   |     | PCC     |
| PPGL649 | 62 | F  | Single   | Yes | NA      |
| PPGL650 | 67 | F  | Single   |     | PCC     |
| PPGL651 | 57 | M  | Single   |     | PCC     |
| PPGL652 | 41 | M  | Multiple |     | TAP/PCC |
| PPGL653 | 69 | F  | Single   |     | PCC     |
| PPGL654 | 52 | F  | Single   |     | PCC     |
| PPGL655 | 43 | F  | Single   |     | PCC     |
| PPGL656 | 22 | F  | Single   |     | PCC     |
| PPGL657 | 37 | F  | Single   |     | PCC     |
| PPGL658 | 45 | F  | Single   |     | PCC     |
| PPGL659 | 48 | F  | Single   |     | PCC     |
| PPGL660 | 16 | M  | Single   |     | PCC     |
| PPGL661 | 72 | M  | Single   |     | TAP     |
| PPGL662 | 59 | F  | Single   |     | PCC     |
| PPGL663 | 56 | F  | Single   |     | PCC     |
| PPGL664 | 48 | M  | Single   |     | PCC     |
| PPGL665 | 80 | F  | Single   |     | PCC     |
| PPGL666 | 62 | M  | Single   |     | PCC     |
| PPGL667 | 37 | M  | Single   |     | PCC     |
| PPGL668 | 21 | F  | Single   |     | TAP     |
| PPGL669 | 57 | F  | Multiple | Yes | TAP/PCC |
| PPGL670 | 59 | M  | Multiple |     | PCC     |
| PPGL671 | 39 | F  | Single   |     | PCC     |
| PPGL672 | 37 | F  | Single   |     | HN      |
| PPGL673 | 43 | F  | Single   |     | PCC     |
| PPGL674 | 71 | F  | Single   |     | PCC     |
| PPGL675 | 31 | F  | Single   |     | PCC     |
| PPGL676 | 53 | F  | Single   |     | TAP     |
| PPGL677 | 35 | F  | Single   |     | PCC     |
| PPGL678 | 48 | M  | Single   |     | PCC     |
| PPGL679 | 74 | F  | Single   |     | PCC     |
| PPGL680 | 39 | M  | Single   |     | PCC     |
| PPGL681 | 47 | F  | Single   |     | PCC     |
| PPGL682 | 26 | F  | Single   |     | TAP     |
| PPGL683 | 26 | F  | Single   |     | PCC     |
| PPGL684 | 44 | M  | Single   |     | PCC     |
| PPGL685 | 47 | M  | Single   |     | TAP     |
| PPGL686 | 36 | M  | Single   |     | PCC     |
| PPGL687 | 40 | M  | Single   | Yes | PCC     |
| PPGL688 | 59 | M  | Single   |     | HN      |
| PPGL689 | 59 | M  | Single   |     | TAP     |
| PPGL690 | 72 | F  | Single   |     | TAP     |
| PPGL691 | 32 | M  | Single   |     | PCC     |
| PPGL692 | 56 | M  | Single   |     | PCC     |
| PPGL693 | 46 | F  | Single   |     | PCC     |
| PPGL694 | 60 | F  | Single   |     | HN      |
| PPGL695 | 56 | F  | Single   |     | TAP     |
| PPGL696 | 54 | M  | Multiple |     | PCC     |
| PPGL697 | 72 | F  | Single   |     | TAP     |
| PPGL698 | 66 | F  | Single   |     | PCC     |
| PPGL699 | 36 | F  | Single   |     | HN      |
| PPGL700 | 62 | F  | Single   |     | PCC     |
| PPGL701 | 60 | F  | Single   |     | HN      |
| PPGL702 | 47 | F  | Single   |     | PCC     |
| PPGL703 | 65 | F  | Multiple |     | PCC     |
| PPGL704 | 57 | M  | Single   |     | PCC     |
| PPGL705 | 32 | F  | Single   | Yes | TAP     |
| PPGL706 | 61 | M  | Single   |     | PCC     |
| PPGL707 | 29 | F  | Single   |     | HN      |
| PPGL708 | 24 | M  | Single   |     | PCC     |
| PPGL709 | 40 | F  | Multiple |     | HN      |
| PPGL710 | 44 | F  | Single   |     | HN      |
| PPGL711 | 37 | F  | Single   |     | HN      |
| PPGL712 | 33 | M  | Single   |     | PCC     |
| PPGL713 | 41 | M  | Single   |     | PCC     |
| PPGL714 | 26 | F  | Single   |     | PCC     |
| PPGL715 | 45 | F  | Single   |     | PCC     |
| PPGL716 | 51 | F  | Single   |     | PCC     |
| PPGL717 | 34 | F  | Single   |     | PCC     |
| PPGL718 | 75 | M  | Single   |     | TAP     |
| PPGL719 | 55 | F  | Single   |     | PCC     |
| PPGL720 | 16 | F  | Single   |     | TAP     |
| PPGL721 | 55 | M  | Single   |     | PCC     |
| PPGL722 | 44 | M  | Single   |     | PCC     |
| PPGL723 | 31 | M  | Single   |     | TAP     |
| PPGL724 | 54 | M  | Single   |     | PCC     |
| PPGL725 | 66 | M  | Single   |     | PCC     |



|         |    |   |          |     |         |
|---------|----|---|----------|-----|---------|
| PPGL726 | 50 | M | Single   |     | PCC     |
| PPGL727 | 43 | F | Single   |     | HN      |
| PPGL728 | NA | F | Single   |     | PCC     |
| PPGL729 | 59 | M | Single   |     | PCC     |
| PPGL730 | NA | F | Single   |     | PCC     |
| PPGL731 | 36 | M | Single   |     | PCC     |
| PPGL732 | 47 | M | Single   |     | PCC     |
| PPGL733 | 42 | F | Single   |     | PCC     |
| PPGL734 | 48 | M | Single   |     | PCC     |
| PPGL735 | 74 | M | Single   |     | PCC     |
| PPGL736 | 41 | F | Single   |     | PCC     |
| PPGL737 | 21 | F | Single   |     | PCC     |
| PPGL738 | 35 | F | Multiple |     | HN      |
| PPGL739 | 33 | M | Multiple |     | PCC     |
| PPGL740 | 62 | F | Single   |     | TAP     |
| PPGL741 | 43 | M | Single   |     | PCC     |
| PPGL742 | 21 | M | Single   |     | PCC     |
| PPGL743 | 59 | F | Single   |     | PCC     |
| PPGL744 | 45 | M | Single   |     | PCC     |
| PPGL745 | 67 | M | Single   |     | PCC     |
| PPGL746 | 52 | M | Single   |     | PCC     |
| PPGL747 | 28 | F | Single   |     | PCC     |
| PPGL748 | 54 | F | Single   |     | PCC     |
| PPGL749 | 66 | M | Single   |     | PCC     |
| PPGL750 | 40 | F | Multiple | Yes | TAP/PCC |
| PPGL751 | 77 | F | Single   |     | HN      |
| PPGL752 | 42 | M | Single   |     | PCC     |
| PPGL753 | 63 | F | Multiple |     | HN      |
| PPGL754 | 16 | M | Multiple |     | PCC     |
| PPGL755 | 43 | M | Single   |     | HN      |
| PPGL756 | 38 | F | Single   |     | HN      |
| PPGL757 | 69 | M | Single   |     | HN      |
| PPGL758 | 15 | M | Single   |     | PCC     |
| PPGL759 | 57 | F | Single   |     | HN      |
| PPGL760 | 32 | M | Single   |     | PCC     |
| PPGL761 | 47 | M | Single   | Yes | PCC     |
| PPGL762 | 9  | M | Single   |     | PCC     |
| PPGL763 | 32 | F | Single   |     | PCC     |
| PPGL764 | 78 | F | Single   |     | HN      |
| PPGL765 | 60 | F | Single   |     | HN      |
| PPGL766 | 44 | M | Single   |     | PCC     |
| PPGL767 | 29 | M | Multiple |     | TAP     |
| PPGL768 | 48 | F | Single   |     | HN      |
| PPGL769 | 26 | M | Single   |     | PCC     |
| PPGL770 | 70 | F | Single   |     | HN      |
| PPGL771 | 59 | F | Single   |     | HN      |
| PPGL772 | 64 | M | Single   | Yes | TAP     |
| PPGL773 | 51 | F | Single   |     | HN      |
| PPGL774 | 74 | F | Single   |     | PCC     |
| PPGL775 | 54 | M | Single   |     | HN      |
| PPGL776 | 47 | F | Single   |     | PCC     |
| PPGL777 | 50 | F | Single   |     | TAP     |
| PPGL778 | 53 | F | Single   |     | HN      |
| PPGL779 | 41 | F | Single   | Yes | PCC     |
| PPGL780 | 62 | F | Single   |     | PCC     |
| PPGL781 | 25 | F | Single   |     | TAP     |
| PPGL782 | 26 | F | Single   |     | TAP     |
| PPGL783 | 40 | M | Single   |     | PCC     |
| PPGL784 | 35 | M | Single   |     | PCC     |
| PPGL785 | 53 | F | Single   |     | HN      |
| PPGL786 | 64 | F | Single   |     | PCC     |
| PPGL787 | 41 | F | Single   |     | PCC     |
| PPGL788 | 38 | M | Single   |     | PCC     |
| PPGL789 | 38 | M | Single   |     | TAP     |
| PPGL790 | 38 | F | Single   |     | TAP     |
| PPGL791 | 36 | M | Single   |     | PCC     |
| PPGL792 | 63 | F | Single   |     | TAP     |
| PPGL793 | 64 | F | Single   |     | HN      |
| PPGL794 | 58 | F | Single   |     | TAP     |
| PPGL795 | 52 | M | Single   |     | HN      |
| PPGL796 | 59 | M | Single   |     | PCC     |
| PPGL797 | 42 | M | Single   |     | PCC     |
| PPGL798 | 64 | M | Single   |     | TAP     |
| PPGL799 | 43 | F | Single   |     | PCC     |
| PPGL800 | 55 | F | Single   |     | HN      |
| PPGL801 | 33 | F | Single   |     | HN      |
| PPGL802 | 46 | F | Single   |     | HN      |
| PPGL803 | 45 | M | Single   |     | PCC     |
| PPGL804 | 43 | M | Multiple |     | PCC     |
| PPGL805 | 52 | F | Single   |     | HN      |
| PPGL806 | 63 | F | Single   |     | HN      |
| PPGL807 | 54 | M | Single   |     | HN      |
| PPGL808 | 70 | M | Single   |     | PCC     |
| PPGL809 | 47 | M | Single   |     | TAP     |
| PPGL810 | NA | M | Single   |     | PCC     |
| PPGL811 | 76 | F | Single   |     | TAP     |
| PPGL812 | 45 | M | Single   |     | TAP     |
| PPGL813 | 59 | M | Single   |     | HN      |
| PPGL814 | 60 | M | Single   |     | TAP     |
| PPGL815 | 63 | F | Single   |     | PCC     |
| PPGL816 | 31 | M | Multiple | Yes | TAP     |
| PPGL817 | 48 | M | Single   |     | PCC     |

|         |    |    |          |     |         |
|---------|----|----|----------|-----|---------|
| PPGL818 | 64 | M  | Single   |     | PCC     |
| PPGL819 | 70 | F  | Single   | Yes | PCC     |
| PPGL820 | 62 | F  | Single   | Yes | HN      |
| PPGL821 | 39 | F  | Single   |     | HN      |
| PPGL822 | 63 | M  | Single   |     | HN      |
| PPGL823 | 44 | F  | Single   |     | PCC     |
| PPGL824 | 46 | F  | Single   |     | PCC     |
| PPGL825 | 42 | F  | Single   |     | PCC     |
| PPGL826 | 49 | F  | Single   |     | PCC     |
| PPGL827 | 68 | M  | Single   |     | HN      |
| PPGL828 | 78 | F  | Single   |     | PCC     |
| PPGL829 | 65 | F  | Single   |     | PCC     |
| PPGL830 | 50 | F  | Single   |     | HN      |
| PPGL831 | 51 | M  | Single   |     | PCC     |
| PPGL832 | 45 | M  | Single   |     | PCC     |
| PPGL833 | 44 | M  | Single   |     | PCC     |
| PPGL834 | 66 | M  | Single   | Yes | PCC     |
| PPGL835 | 44 | F  | Single   |     | PCC     |
| PPGL836 | 59 | F  | Single   |     | TAP     |
| PPGL837 | 62 | F  | Single   |     | HN      |
| PPGL838 | 58 | F  | Single   |     | PCC     |
| PPGL839 | 42 | F  | Single   |     | PCC     |
| PPGL840 | 31 | F  | Single   |     | PCC     |
| PPGL841 | NA | F  | Single   |     | PCC     |
| PPGL842 | 64 | M  | Multiple |     | TAP/PCC |
| PPGL843 | 20 | M  | Single   | Yes | PCC     |
| PPGL844 | 23 | F  | Single   |     | PCC     |
| PPGL845 | 48 | F  | Single   |     | PCC     |
| PPGL846 | 35 | F  | Single   |     | PCC     |
| PPGL847 | 79 | F  | Multiple |     | PCC/HN  |
| PPGL848 | 39 | M  | Single   | Yes | PCC     |
| PPGL849 | 43 | F  | Single   |     | PCC     |
| PPGL850 | 43 | F  | Single   |     | PCC     |
| PPGL851 | 53 | F  | Single   |     | PCC     |
| PPGL852 | 49 | M  | Single   |     | PCC     |
| PPGL853 | 52 | F  | Single   |     | PCC     |
| PPGL854 | 23 | F  | Single   |     | TAP     |
| PPGL855 | 56 | F  | Single   |     | PCC     |
| PPGL856 | 49 | M  | Single   |     | TAP     |
| PPGL857 | 57 | M  | Single   |     | TAP     |
| PPGL858 | 29 | F  | Multiple |     | PCC     |
| PPGL859 | 41 | F  | Single   |     | TAP     |
| PPGL860 | 70 | M  | Single   | Yes | PCC     |
| PPGL861 | NA | F  | Single   | Yes | NA      |
| PPGL862 | 86 | F  | Single   |     | HN      |
| PPGL863 | 38 | F  | Single   |     | PCC     |
| PPGL864 | 35 | M  | Single   |     | PCC     |
| PPGL865 | 44 | F  | Single   |     | PCC     |
| PPGL866 | 56 | F  | Single   | Yes | TAP     |
| PPGL867 | 66 | F  | Single   |     | TAP     |
| PPGL868 | 46 | M  | Single   |     | HN      |
| PPGL869 | 54 | F  | Single   |     | PCC     |
| PPGL870 | 51 | M  | Single   |     | TAP     |
| PPGL871 | 72 | F  | Single   |     | HN      |
| PPGL872 | 65 | F  | Single   |     | PCC     |
| PPGL873 | 51 | F  | Single   |     | PCC     |
| PPGL874 | 71 | M  | Single   | Yes | TAP     |
| PPGL875 | 25 | F  | Single   |     | PCC     |
| PPGL876 | 82 | M  | Single   |     | TAP     |
| PPGL877 | NA | F  | Single   | Yes | PCC     |
| PPGL878 | 33 | M  | Single   | Yes | TAP     |
| PPGL879 | 56 | M  | Single   |     | PCC     |
| PPGL880 | 41 | NA | Single   | Yes | PCC     |
| PPGL881 | 56 | F  | Single   |     | PCC     |
| PPGL882 | 24 | F  | Single   | Yes | PCC     |
| PPGL883 | 39 | F  | Single   |     | PCC     |
| PPGL884 | 57 | F  | Single   |     | TAP     |
| PPGL885 | 30 | F  | Single   |     | PCC     |
| PPGL886 | 50 | F  | Single   |     | HN      |
| PPGL887 | 40 | F  | Single   |     | PCC     |
| PPGL888 | 14 | F  | Single   |     | TAP     |
| PPGL889 | 39 | F  | Single   |     | PCC     |
| PPGL890 | 40 | M  | Multiple |     | PCC     |
| PPGL891 | 44 | M  | Single   |     | PCC     |
| PPGL892 | 45 | F  | Single   |     | HN      |
| PPGL893 | 50 | F  | Single   |     | PCC     |
| PPGL894 | 43 | F  | Single   |     | HN      |
| PPGL895 | 56 | F  | Single   |     | PCC     |
| PPGL896 | 59 | M  | Single   |     | PCC     |
| PPGL897 | 51 | F  | Single   |     | HN      |
| PPGL898 | 70 | F  | Single   |     | HN      |
| PPGL899 | 42 | M  | Single   |     | PCC     |
| PPGL900 | 78 | F  | Single   |     | PCC     |
| PPGL901 | 59 | NA | Single   |     | PCC     |
| PPGL902 | 53 | F  | Single   |     | TAP     |
| PPGL903 | 64 | F  | Single   |     | PCC     |
| PPGL904 | 64 | M  | Single   |     | PCC     |
| PPGL905 | 60 | F  | Single   |     | TAP     |
| PPGL906 | 64 | F  | Single   |     | HN      |
| PPGL907 | 18 | F  | Single   |     | TAP     |
| PPGL908 | 45 | F  | Single   |     | HN      |
| PPGL909 | 78 | F  | Single   |     | HN      |

|         |    |   |          |     |        |
|---------|----|---|----------|-----|--------|
| PPGL910 | 60 | M | Single   |     | PCC    |
| PPGL911 | 58 | F | Single   |     | TAP    |
| PPGL912 | 71 | F | Single   |     | TAP    |
| PPGL913 | 31 | F | Single   |     | TAP    |
| PPGL914 | 65 | F | Multiple |     | HN/TAP |
| PPGL915 | 65 | F | Single   |     | HN     |
| PPGL916 | 73 | M | Multiple |     | PCC    |
| PPGL917 | 67 | F | Single   |     | TAP    |
| PPGL918 | 63 | F | Single   |     | HN     |
| PPGL919 | 58 | F | Single   |     | HN     |
| PPGL920 | 15 | M | Multiple |     | PCC    |
| PPGL921 | 59 | M | Single   |     | PCC    |
| PPGL922 | 47 | M | Single   |     | PCC    |
| PPGL923 | 74 | F | Single   |     | HN     |
| PPGL924 | 60 | F | Single   |     | HN     |
| PPGL925 | 40 | M | Single   | Yes | PCC    |
| PPGL926 | 28 | M | Single   |     | TAP    |
| PPGL927 | 70 | F | Single   |     | HN     |
| PPGL928 | 43 | F | Single   |     | HN     |
| PPGL929 | 46 | M | Single   |     | HN     |
| PPGL930 | 25 | M | Single   |     | TAP    |
| PPGL931 | 75 | F | Single   |     | TAP    |
| PPGL932 | 50 | M | Single   |     | PCC    |
| PPGL933 | 62 | F | Single   |     | PCC    |
| PPGL934 | 75 | F | Single   |     | HN     |
| PPGL935 | 74 | F | Single   |     | HN     |
| PPGL936 | 35 | F | Single   |     | HN     |
| PPGL937 | 49 | M | Single   |     | TAP    |
| PPGL938 | 59 | M | Single   |     | PCC    |
| PPGL939 | 24 | F | Single   |     | HN     |
| PPGL940 | 45 | F | Single   |     | HN     |
| PPGL941 | NA | F | Single   |     | PCC    |
| PPGL942 | 67 | F | Single   |     | HN     |
| PPGL943 | 50 | F | Single   |     | HN     |
| PPGL944 | NA | F | Single   |     | PCC    |
| PPGL945 | 69 | F | Single   |     | HN     |
| PPGL946 | 66 | F | Single   |     | PCC    |
