# Supplementary material
Source: PubMed Central journal article supplement (PMC7591712)
Supplement: jmedgenet-2019-106519supp002.pdf [file jmedgenet-2019-106519supp002.pdf]

**Supplementary Table S2:** Individual clinical and tumor characteristics of patients in "VHL-like", "Multiple VHL tumors" and "Single VHL tumor" cohorts. M: male, F: female, RCC: renal carcinoma, PET: pancreatic endocrine tumor, CNS hemangioblastoma: central nervous system hemangioblastoma, HN: head and neck PPGL, TAP: thoracic, abdominal or pelvic PPGL, PCC: pheochromocytoma, NA: not available.

| Number                | Age at diagnostic | Sex | Family history of VHL tumors | Localization (1)          | Localization (2)          | Localization (3)          | Localization (4) |
|-----------------------|-------------------|-----|------------------------------|---------------------------|---------------------------|---------------------------|------------------|
| Multiple VHL tumors1  | 69                | NA  | No                           | PCC                       | RCC                       |                           |                  |
| Multiple VHL tumors2  | 53                | F   | No                           | PCC                       | PET                       |                           |                  |
| Multiple VHL tumors3  | 66                | F   | No                           | PCC                       | PET                       |                           |                  |
| Multiple VHL tumors4  | 44                | M   | No                           | RCC                       | PET                       |                           |                  |
| Multiple VHL tumors5  | 26                | M   | No                           | Multiple RCC              |                           |                           |                  |
| Multiple VHL tumors6  | 47                | M   | No                           | PCC                       | RCC                       |                           |                  |
| Multiple VHL tumors7  | 23                | M   | No                           | PCC                       | RCC                       |                           |                  |
| Multiple VHL tumors8  | 26                | M   | No                           | Multiple RCC              |                           |                           |                  |
| Multiple VHL tumors9  | 31                | F   | No                           | PCC                       | RCC                       |                           |                  |
| Multiple VHL tumors10 | 48                | M   | No                           | RCC                       | Epididymal cystadenoma    |                           |                  |
| Multiple VHL tumors11 | 49                | NA  | No                           | Multiple RCC              |                           |                           |                  |
| Multiple VHL tumors12 | 49                | NA  | No                           | Multiple RCC              |                           |                           |                  |
| Multiple VHL tumors13 | 48                | NA  | No                           | Multiple RCC              |                           |                           |                  |
| Multiple VHL tumors14 | 81                | NA  | No                           | Multiple RCC              | Renal cyst                |                           |                  |
| Multiple VHL tumors15 | 53                | NA  | No                           | Multiple RCC              |                           |                           |                  |
| Multiple VHL tumors16 | 57                | NA  | No                           | Multiple RCC              |                           |                           |                  |
| Multiple VHL tumors17 | 47                | NA  | No                           | Multiple RCC              |                           |                           |                  |
| Multiple VHL tumors18 | 44                | NA  | No                           | Multiple RCC              |                           |                           |                  |
| Multiple VHL tumors19 | 29                | NA  | No                           | RCC                       | Multiple renal cysts      | Multiple pancreatic cysts |                  |
| Multiple VHL tumors20 | 63                | NA  | No                           | Multiple RCC              | Pancreatic cyst           |                           |                  |
| Multiple VHL tumors21 | 61                | NA  | No                           | PET                       | Multiple RCC              |                           |                  |
| Multiple VHL tumors22 | NA                | F   | No                           | RCC                       | Multiple pancreatic cysts |                           |                  |
| Multiple VHL tumors23 | NA                | M   | No                           | RCC                       | Polycythemia              |                           |                  |
| Multiple VHL tumors24 | NA                | NA  | No                           | RCC                       | Polycythemia              |                           |                  |
| Multiple VHL tumors25 | 81                | M   | No                           | RCC                       |                           |                           |                  |
| Multiple VHL tumors26 | 65                | M   | No                           | PGL TAP                   | Multiple renal cysts      |                           |                  |
| Multiple VHL tumors27 | 39                | F   | No                           | PCC                       | Pancreatic cyst           |                           |                  |
| Multiple VHL tumors28 | 47                | M   | No                           | PGL TAP                   | PET                       |                           |                  |
| Multiple VHL tumors29 | 41                | M   | No                           | PCC                       | RCC                       |                           |                  |
| Multiple VHL tumors30 | 55                | M   | No                           | PCC                       | Multiple renal cysts      |                           |                  |
| Multiple VHL tumors31 | 47                | F   | No                           | PCC                       | PET                       |                           |                  |
| Multiple VHL tumors32 | 78                | F   | No                           | PCC                       | Multiple renal cysts      | PET                       | Pancreatic cyst  |
| Multiple VHL tumors33 | 57                | F   | No                           | PCC                       | RCC                       | PET                       |                  |
| Multiple VHL tumors34 | NA                | M   | No                           | PCC                       | PET                       |                           |                  |
| Multiple VHL tumors35 | 63                | M   | No                           | PCC                       | RCC                       |                           |                  |
| Multiple VHL tumors36 | 58                | M   | No                           | PCC                       | RCC                       |                           |                  |
| Multiple VHL tumors37 | 61                | F   | No                           | PCC                       | Pancreatic cyst           |                           |                  |
| Multiple VHL tumors38 | 51                | M   | No                           | PCC                       | RCC                       |                           |                  |
| Multiple VHL tumors39 | 63                | M   | No                           | Multiple RCC              | PET                       |                           |                  |
| Multiple VHL tumors40 | 69                | M   | No                           | RCC                       | PET                       |                           |                  |
| Multiple VHL tumors41 | 43                | F   | No                           | Multiple pancreatic cysts |                           |                           |                  |
| Multiple VHL tumors42 | NA                | M   | No                           | Multiple RCC              | PET                       |                           |                  |
| Multiple VHL tumors43 | NA                | F   | No                           | RCC                       | PET                       |                           |                  |
| Multiple VHL tumors44 | 58                | F   | No                           | Multiple PET              |                           |                           |                  |
| Multiple VHL tumors45 | 60                | F   | No                           | Multiple PET              |                           |                           |                  |
| Multiple VHL tumors46 | NA                | M   | No                           | Multiple renal cysts      | PET                       |                           |                  |
| Multiple VHL tumors47 | 56                | M   | No                           | Multiple renal cysts      | Multiple PET              |                           |                  |
| Multiple VHL tumors48 | NA                | F   | No                           | Multiple pancreatic cysts |                           |                           |                  |
| Multiple VHL tumors49 | 70                | F   | No                           | Multiple pancreatic cysts |                           |                           |                  |
| Multiple VHL tumors50 | 64                | F   | No                           | Multiple pancreatic cysts |                           |                           |                  |
| Multiple VHL tumors51 | NA                | F   | No                           | PET                       | Pancreatic cyst           |                           |                  |
| Multiple VHL tumors52 | 49                | F   | No                           | RCC                       | PET                       |                           |                  |
| Multiple VHL tumors53 | 63                | F   | No                           | Multiple PET              |                           |                           |                  |
| Multiple VHL tumors54 | 58                | M   | No                           | RCC                       | PET                       |                           |                  |
| Multiple VHL tumors55 | 61                | M   | No                           | RCC                       | PET                       |                           |                  |
| Multiple VHL tumors56 | 64                | M   | No                           | PET                       | Pancreatic cyst           |                           |                  |
| Multiple VHL tumors57 | 79                | M   | No                           | PCC                       | RCC                       |                           |                  |
| Multiple VHL tumors58 | NA                | M   | No                           | Multiple PET              |                           |                           |                  |
| Multiple VHL tumors59 | 59                | F   | No                           | Multiple PET              |                           |                           |                  |
| Multiple VHL tumors60 | NA                | M   | No                           | Multiple PET              |                           |                           |                  |
| Multiple VHL tumors61 | NA                | M   | No                           | Multiple PET              |                           |                           |                  |
| Multiple VHL tumors62 | 64                | M   | No                           | Multiple PET              |                           |                           |                  |
| Multiple VHL tumors63 | 58                | F   | No                           | Multiple renal cysts      | PET                       |                           |                  |
| Multiple VHL tumors64 | NA                | F   | No                           | Multiple renal cysts      | PET                       |                           |                  |
| Multiple VHL tumors65 | 61                | F   | No                           | Multiple PET              |                           |                           |                  |
| Multiple VHL tumors66 | 76                | F   | No                           | RCC                       | Multiple PET              |                           |                  |
| Multiple VHL tumors67 | 52                | F   | No                           | RCC                       | PET                       |                           |                  |
| Multiple VHL tumors68 | 11                | F   | No                           | PET                       | Pancreatic cyst           |                           |                  |
| Multiple VHL tumors69 | 69                | NA  | Yes (Pancreatic cyst)        | PGL TAP                   | Polycythemia              |                           |                  |
| Multiple VHL tumors70 | 55                | F   | No                           | PGL TAP                   | Polycythemia              |                           |                  |
| Single VHL tumor1     | 51                | F   | No                           | CNS hemangioblastoma      |                           |                           |                  |
| Single VHL tumor2     | 54                | M   | No                           | Multiple renal cysts      |                           |                           |                  |
| Single VHL tumor3     | 12                | F   | No                           | RCC                       |                           |                           |                  |
| Single VHL tumor4     | 42                | M   | No                           | RCC                       |                           |                           |                  |
| Single VHL tumor5     | 25                | NA  | No                           | Retinal hemangioblastoma  |                           |                           |                  |
| Single VHL tumor6     | 14                | NA  | No                           | Retinal hemangioblastoma  |                           |                           |                  |
| Single VHL tumor7     | 50                | NA  | No                           | CNS hemangioblastoma      |                           |                           |                  |
| Single VHL tumor8     | 35                | NA  | No                           | CNS hemangioblastoma      |                           |                           |                  |
| Single VHL tumor9     | 32                | NA  | No                           | Medulla hemangioblastoma  |                           |                           |                  |
| Single VHL tumor10    | 21                | NA  | No                           | CNS hemangioblastoma      |                           |                           |                  |
| Single VHL tumor11    | 17                | NA  | No                           | CNS hemangioblastoma      |                           |                           |                  |
| Single VHL tumor12    | 36                | NA  | No                           | CNS hemangioblastoma      |                           |                           |                  |
| Single VHL tumor13    | 22                | NA  | No                           | CNS hemangioblastoma      |                           |                           |                  |
| Single VHL tumor14    | 22                | NA  | No                           | CNS hemangioblastoma      |                           |                           |                  |
| Single VHL tumor15    | 14                | NA  | No                           | CNS hemangioblastoma      |                           |                           |                  |
| Single VHL tumor16    | 30                | NA  | No                           | CNS hemangioblastoma      |                           |                           |                  |
| Single VHL tumor17    | 35                | NA  | No                           | CNS hemangioblastoma      |                           |                           |                  |
| Single VHL tumor18    | 22                | NA  | No                           | Retinal hemangioblastoma  |                           |                           |                  |
| Single VHL tumor19    | 33                | NA  | No                           | Retinal hemangioblastoma  |                           |                           |                  |
| Single VHL tumor20    | 37                | NA  | No                           | CNS hemangioblastoma      |                           |                           |                  |
| Single VHL tumor21    | 23                | NA  | No                           | CNS hemangioblastoma      |                           |                           |                  |
| Single VHL tumor22    | 16                | NA  | No                           | CNS hemangioblastoma      |                           |                           |                  |
| Single VHL tumor23    | 17                | NA  | No                           | Retinal hemangioblastoma  |                           |                           |                  |
| Single VHL tumor24    | 19                | NA  | No                           | CNS hemangioblastoma      |                           |                           |                  |
| Single VHL tumor25    | NA                | NA  | No                           | CNS hemangioblastoma      |                           |                           |                  |
| Single VHL tumor26    | 29                | M   | No                           | Retinal hemangioblastoma  |                           |                           |                  |
| Single VHL tumor27    | NA                | F   | No                           | Endolymphatic sac tumor   |                           |                           |                  |
| Single VHL tumor28    | 39                | M   | No                           | RCC                       |                           |                           |                  |
| Single VHL tumor29    | 25                | F   | No                           | Endolymphatic sac tumor   |                           |                           |                  |
| Single VHL tumor30    | 66                | F   | No                           | Multiple pancreatic cysts |                           |                           |                  |
| Single VHL tumor31    | 14                | F   | No                           | PET                       |                           |                           |                  |
| Single VHL tumor32    | 41                | F   | No                           | Multiple pancreatic cysts |                           |                           |                  |
| Single VHL tumor33    | 22                | F   | No                           | Endolymphatic sac tumor   |                           |                           |                  |
| Single VHL tumor34    | 34                | M   | No                           | CNS hemangioblastoma      |                           |                           |                  |
| Single VHL tumor35    | 18                | M   | No                           | Pancreatic cyst           |                           |                           |                  |
| Single VHL tumor36    | 67                | M   | No                           | Multiple pancreatic cysts |                           |                           |                  |
| Single VHL tumor37    | 58                | M   | No                           | Multiple renal cysts      |                           |                           |                  |
| Single VHL tumor38    | 38                | F   | No                           | Retinal hemangioblastoma  |                           |                           |                  |
| Single VHL tumor39    | 60                | F   | No                           | CNS hemangioblastoma      |                           |                           |                  |
| Single VHL tumor40    | 30                | F   | No                           | Pancreatic cyst           |                           |                           |                  |
| Single VHL tumor41    | 59                | M   | No                           | PET                       |                           |                           |                  |
| Single VHL tumor42    | 40                | F   | No                           | Retinal hemangioblastoma  |                           |                           |                  |
| Single VHL tumor43    | 27                | F   | No                           | Retinal hemangioblastoma  |                           |                           |                  |
| Single VHL tumor44    | 71                | F   | No                           | Pancreatic cyst           |                           |                           |                  |
| Single VHL tumor45    | 59                | F   | No                           | CNS hemangioblastoma      |                           |                           |                  |
| Single VHL tumor46    | 11                | F   | No                           | Retinal hemangioblastoma  |                           |                           |                  |
| Single VHL tumor47    | 43                | F   | No                           | PET                       |                           |                           |                  |
| Single VHL tumor48    | 34                | F   | No                           | PET                       |                           |                           |                  |
| Single VHL tumor49    | 23                | F   | No                           | CNS hemangioblastoma      |                           |                           |                  |
| Single VHL tumor50    | 31                | F   | No                           | CNS hemangioblastoma      |                           |                           |                  |
| Single VHL tumor51    | NA                | M   | No                           | Medulla hemangioblastoma  |                           |                           |                  |

|                    |    |    |                            |                                    |                                    |  |  |                           |
|--------------------|----|----|----------------------------|------------------------------------|------------------------------------|--|--|---------------------------|
| Single VHL tumor52 | 78 | F  | No                         | CNS hemangioblastoma               |                                    |  |  |                           |
| Single VHL tumor53 | NA | F  | No                         | PET                                |                                    |  |  |                           |
| Single VHL tumor54 | NA | M  | No                         | PET                                |                                    |  |  |                           |
| Single VHL tumor55 | NA | M  | No                         | CNS hemangioblastoma               |                                    |  |  |                           |
| Single VHL tumor56 | NA | F  | No                         | Multiple pancreatic cysts          |                                    |  |  |                           |
| Single VHL tumor57 | NA | F  | No                         | Pancreatic cyst                    |                                    |  |  |                           |
| Single VHL tumor58 | 42 | F  | No                         | CNS hemangioblastoma               |                                    |  |  |                           |
| Single VHL tumor59 | NA | M  | No                         | Endolymphatic sac tumor            |                                    |  |  |                           |
| Single VHL tumor60 | 35 | M  | No                         | CNS hemangioblastoma               |                                    |  |  |                           |
| Single VHL tumor61 | 25 | F  | No                         | Multiple pancreatic cysts          |                                    |  |  |                           |
| Single VHL tumor62 | NA | F  | No                         | PET                                |                                    |  |  |                           |
| Single VHL tumor63 | 37 | M  | No                         | Endolymphatic sac tumor            |                                    |  |  |                           |
| Single VHL tumor64 | NA | M  | No                         | Multiple pancreatic cysts          |                                    |  |  |                           |
| Single VHL tumor65 | 45 | F  | No                         | PET                                |                                    |  |  |                           |
| Single VHL tumor66 | 40 | M  | No                         | Pancreatic cyst                    |                                    |  |  |                           |
| Single VHL tumor67 | 37 | F  | No                         | Multiple pancreatic cysts          |                                    |  |  |                           |
| Single VHL tumor68 | 38 | M  | No                         | Multiple pancreatic cysts          |                                    |  |  |                           |
| Single VHL tumor69 | 33 | F  | No                         | Pancreatic cyst                    |                                    |  |  |                           |
| Single VHL tumor70 | 37 | M  | No                         | Epididymal cystadenoma             |                                    |  |  |                           |
| Single VHL tumor71 | 42 | F  | No                         | Polycythemia                       |                                    |  |  |                           |
| Single VHL tumor72 | 14 | F  | No                         | Polycythemia                       |                                    |  |  |                           |
| Single VHL tumor73 | 14 | M  | No                         | Polycythemia                       |                                    |  |  |                           |
| Single VHL tumor74 | 43 | M  | No                         | Polycythemia                       |                                    |  |  |                           |
| Single VHL tumor75 | NA | M  | No                         | Polycythemia                       |                                    |  |  |                           |
| VHL-like1          | 53 | NA | Yes (RCC)                  | PCC                                |                                    |  |  |                           |
| VHL-like2          | 35 | F  | Yes (CNS hemangioblastoma) | RCC                                |                                    |  |  |                           |
| VHL-like3          | 73 | F  | Yes (RCC)                  | RCC                                |                                    |  |  |                           |
| VHL-like4          | 64 | F  | Yes (RCC)                  | RCC                                |                                    |  |  |                           |
| VHL-like5          | 34 | F  | Yes (RCC)                  | RCC                                |                                    |  |  |                           |
| VHL-like6          | 28 | F  | Yes (RCC)                  | RCC                                |                                    |  |  |                           |
| VHL-like7          | 42 | M  | Yes (RCC)                  | RCC                                |                                    |  |  |                           |
| VHL-like8          | 55 | F  | Yes                        | CNS hemangioblastoma               |                                    |  |  |                           |
| VHL-like9          | 45 | M  | Yes (RCC)                  | PET                                |                                    |  |  |                           |
| VHL-like10         | 70 | F  | Yes (RCC)                  | PCC                                |                                    |  |  |                           |
| VHL-like11         | NA | F  | Yes (PET)                  | PGL HN                             |                                    |  |  |                           |
| VHL-like12         | 21 | F  | Yes (RCC)                  | Bilateral PCC                      |                                    |  |  |                           |
| VHL-like13         | 24 | F  | No                         | Retinal hemangioblastoma           | RCC                                |  |  | PCC                       |
| VHL-like14         | 35 | NA | No                         | CNS hemangioblastoma               | RCC                                |  |  |                           |
| VHL-like15         | 54 | NA | No                         | Medulla hemangioblastoma           | Multiple RCC                       |  |  | PGL TAP                   |
| VHL-like16         | 34 | NA | Yes (CNS hemangioblastoma) | CNS hemangioblastoma               |                                    |  |  |                           |
| VHL-like17         | 42 | NA | No                         | Multiple medulla hemangioblastomas |                                    |  |  |                           |
| VHL-like18         | 35 | NA | Yes (RCC)                  | RCC                                |                                    |  |  |                           |
| VHL-like19         | 56 | NA | Yes (RCC)                  | RCC                                |                                    |  |  |                           |
| VHL-like20         | 56 | NA | No                         | Multiple CNS hemangioblastomas     |                                    |  |  |                           |
| VHL-like21         | 38 | NA | No                         | Multiple CNS hemangioblastomas     | RCC                                |  |  |                           |
| VHL-like22         | 67 | NA | No                         | Multiple CNS hemangioblastomas     |                                    |  |  |                           |
| VHL-like23         | 20 | NA | No                         | Multiple CNS hemangioblastomas     | PET                                |  |  |                           |
| VHL-like24         | NA | NA | No                         | Multiple retinal hemangioblastomas | RCC                                |  |  | Pancreatic cyst           |
| VHL-like25         | 43 | NA | Yes (CNS hemangioblastoma) | CNS hemangioblastoma               |                                    |  |  |                           |
| VHL-like26         | NA | F  | No                         | CNS hemangioblastoma               | Retinal hemangioblastoma           |  |  |                           |
| VHL-like27         | NA | F  | No                         | Multiple retinal hemangioblastomas |                                    |  |  |                           |
| VHL-like28         | NA | M  | No                         | CNS hemangioblastoma               | PCC                                |  |  |                           |
| VHL-like29         | NA | NA | No                         | CNS hemangioblastoma               | PCC                                |  |  | Renal cyst                |
| VHL-like30         | NA | NA | No                         | Multiple CNS hemangioblastomas     |                                    |  |  |                           |
| VHL-like31         | NA | NA | No                         | CNS hemangioblastoma               | Retinal hemangioblastoma           |  |  | Multiple pancreatic cysts |
| VHL-like32         | NA | NA | Yes (RCC)                  | RCC                                |                                    |  |  |                           |
| VHL-like33         | NA | M  | Yes (RCC)                  | RCC                                |                                    |  |  |                           |
| VHL-like34         | NA | F  | Yes (RCC)                  | RCC                                |                                    |  |  |                           |
| VHL-like35         | NA | NA | Yes                        | CNS hemangioblastoma               |                                    |  |  |                           |
| VHL-like36         | NA | F  | Yes                        | CNS hemangioblastoma               |                                    |  |  |                           |
| VHL-like37         | NA | NA | No                         | CNS hemangioblastoma               | RCC                                |  |  |                           |
| VHL-like38         | 36 | F  | No                         | Multiple retinal hemangioblastomas |                                    |  |  |                           |
| VHL-like39         | NA | F  | Yes                        | CNS hemangioblastoma               | Multiple retinal hemangioblastomas |  |  | PCC                       |
| VHL-like40         | NA | M  | Yes                        | CNS hemangioblastoma               | Multiple retinal hemangioblastomas |  |  | Multiple RCC              |
| VHL-like41         | NA | F  | No                         | CNS hemangioblastoma               | Multiple pancreatic cysts          |  |  |                           |
| VHL-like42         | NA | F  | No                         | Multiple retinal hemangioblastomas |                                    |  |  |                           |
| VHL-like43         | NA | NA | No                         | CNS hemangioblastoma               | Retinal hemangioblastoma           |  |  |                           |
| VHL-like44         | NA | NA | No                         | CNS hemangioblastoma               | Retinal hemangioblastoma           |  |  | PCC                       |
| VHL-like45         | NA | NA | No                         | Multiple CNS hemangioblastomas     |                                    |  |  |                           |
| VHL-like46         | NA | F  | No                         | CNS hemangioblastoma               | Multiple retinal hemangioblastomas |  |  | Multiple RCC              |
| VHL-like47         | 37 | F  | Yes (RCC)                  | RCC                                |                                    |  |  | Multiple pancreatic cysts |
| VHL-like48         | 47 | M  | No                         | CNS hemangioblastoma               | RCC                                |  |  |                           |
| VHL-like49         | 53 | M  | Yes (RCC)                  | RCC                                |                                    |  |  |                           |
| VHL-like50         | 42 | F  | No                         | Medulla hemangioblastoma           | RCC                                |  |  |                           |
| VHL-like51         | NA | F  | No                         | Retinal hemangioblastoma           | PCC                                |  |  |                           |
| VHL-like52         | 69 | M  | No                         | CNS hemangioblastoma               | RCC                                |  |  |                           |
| VHL-like53         | 44 | F  | No                         | Retinal hemangioblastoma           | Pancreatic cyst                    |  |  |                           |
| VHL-like54         | 78 | M  | No                         | CNS hemangioblastoma               | PCC                                |  |  |                           |
| VHL-like55         | 55 | F  | No                         | CNS hemangioblastoma               | RCC                                |  |  |                           |
| VHL-like56         | 50 | F  | No                         | CNS hemangioblastoma               | PGL TAP                            |  |  |                           |
| VHL-like57         | 36 | F  | No                         | CNS hemangioblastoma               | PGL TAP                            |  |  | PET                       |
| VHL-like58         | 56 | M  | No                         | CNS hemangioblastoma               | PGL TAP                            |  |  | Pancreatic cyst           |
| VHL-like59         | 49 | F  | No                         | Medulla hemangioblastoma           | PCC                                |  |  |                           |
| VHL-like60         | 59 | M  | No                         | CNS hemangioblastoma               | PCC                                |  |  |                           |
| VHL-like61         | 59 | M  | No                         | CNS hemangioblastoma               | PCC                                |  |  |                           |
| VHL-like62         | 66 | F  | No                         | Medulla hemangioblastoma           | PCC                                |  |  |                           |
| VHL-like63         | 67 | F  | No                         | CNS hemangioblastoma               | PCC                                |  |  |                           |
| VHL-like64         | 33 | M  | Yes (RCC)                  | PCC                                |                                    |  |  |                           |
| VHL-like65         | 29 | F  | Yes (RCC)                  | PCC                                |                                    |  |  |                           |
| VHL-like66         | 15 | F  | No                         | CNS hemangioblastoma               | RCC                                |  |  |                           |
| VHL-like67         | NA | M  | No                         | CNS hemangioblastoma               | PET                                |  |  |                           |
| VHL-like68         | NA | M  | No                         | CNS hemangioblastoma               | PCC                                |  |  |                           |
| VHL-like69         | 52 | F  | Yes (RCC)                  | PGL HN                             |                                    |  |  |                           |
| VHL-like70         | 50 | M  | Yes (RCC)                  | PCC                                |                                    |  |  |                           |
| VHL-like71         | 30 | M  | Yes (RCC)                  | PCC                                |                                    |  |  |                           |
| VHL-like72         | 48 | M  | Yes (RCC)                  | PCC                                |                                    |  |  |                           |
| VHL-like73         | 32 | F  | No                         | CNS hemangioblastoma               | PGL HN                             |  |  | Renal cyst                |
| VHL-like74         | 42 | M  | No                         | CNS hemangioblastoma               | PCC                                |  |  |                           |
| VHL-like75         | 38 | F  | Yes (RCC)                  | PGL HN                             |                                    |  |  |                           |
| VHL-like76         | 20 | F  | No                         | CNS hemangioblastoma               | PGL TAP                            |  |  |                           |
